# Supplementary material
Source: PubMed Central journal article supplement (PMC7595583)
Supplement: KEPI_A_1762392_SM6537.pdf [file KEPI_A_1762392_SM6537.pdf]

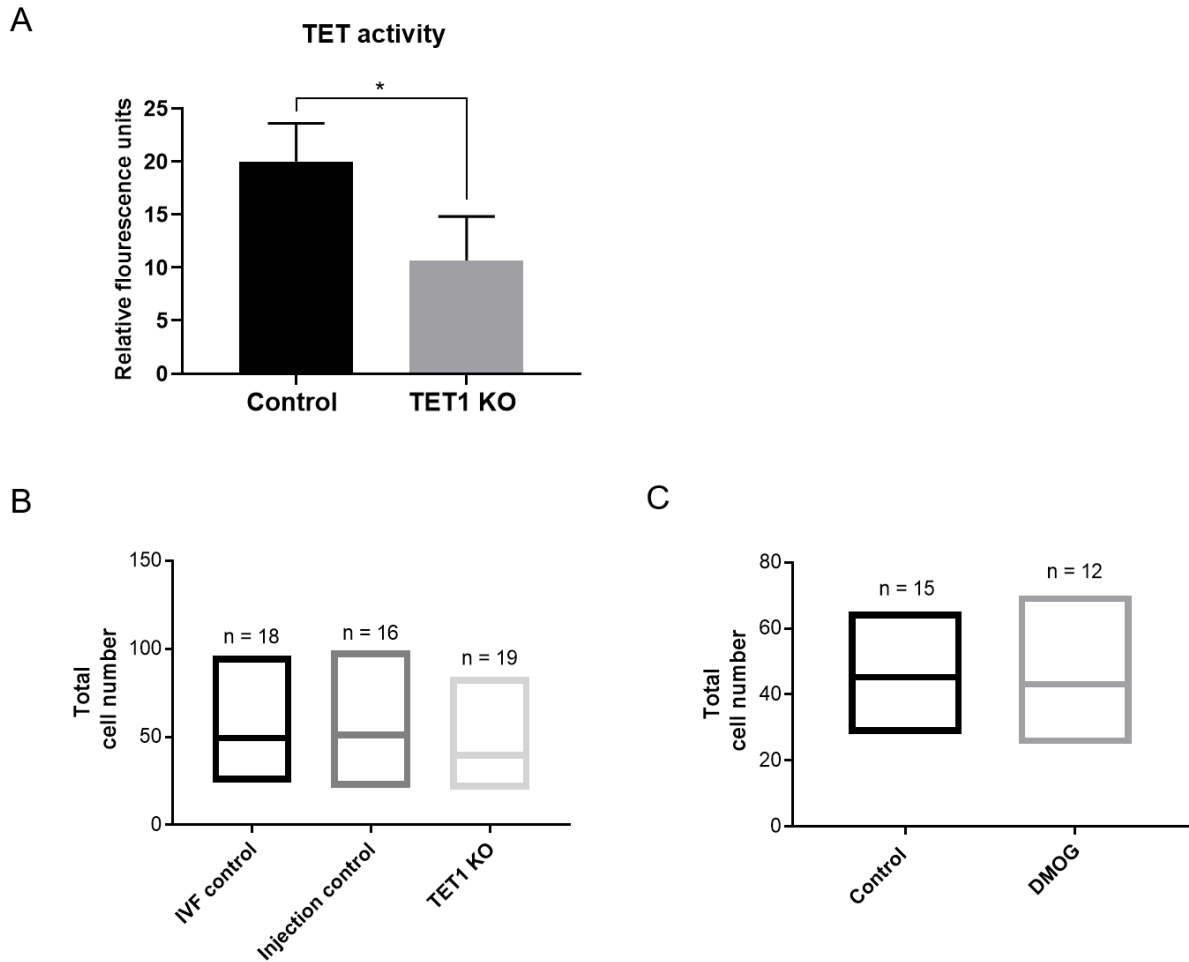

Fig. S1. TET activity and total cell number in TET1-disrupted and DMOG-treated blastocysts. (A) Measurement of TET enzyme activity in *TET1* KO blastocysts. Total TET enzyme activity in *TET1* KO blastocysts was decreased compared to that in control blastocysts. Error bars represent standard deviation. A p-value < 0.05 was considered statistically significant. (B) There was no significant difference of total cell number between IVF control, injection control (Cas9 only), and *TET1* KO blastocysts. (C) Total cell number of blastocysts incubated with DMOG was not different compared to that of control blastocysts. Top horizontal line and bottom horizontal line of the box indicate maximum and minimum values, respectively. Middle horizontal line indicates average value. A p-value < 0.05 was considered statistically significant.

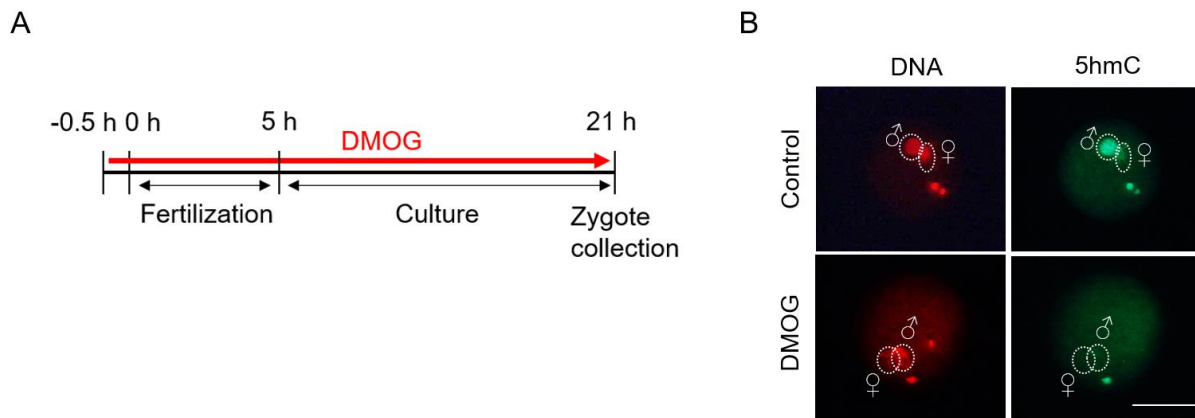

Fig. S2. The effect of DMOG treatment on TET3 inhibition in zygotes. (A) Timeline of DMOG treatment to inhibit TET3 activity in zygotes. Oocytes were incubated with 1mM DMOG for 30 min before fertilization and the treatment was maintained during fertilization and embryo culture for further 21 h, then zygotes were collected for immunocytochemistry analysis. (B) Inhibition of TET3 activity by DMOG treatment. In control zygotes, formation of 5hmC was detected in both paternal and maternal pronuclei. 5hmC was disappeared in pronuclei when zygotes were incubated with DMOG.

Table S1. Validation of targeting efficiency by CRISPR/Cas9 at *TET1* gene locus. All blastocysts genotyped carried mutations at the three target sites indicating 100% targeting efficiency.

| Embryos genotyped<br>(n=10) | Target site 1 | Target site 2 | Target site 3       |
|-----------------------------|---------------|---------------|---------------------|
| Embryo #1                   | Homozygous    | Homozygous    | Mosaic w/ wildtype  |
| Embryo #2                   | Homozygous    | Homozygous    | Mosaic w/ wildtype  |
| Embryo #3                   | Homozygous    | Biallelic     | Mosaic w/ wildtype  |
| Embryo #4                   | Biallelic     | Biallelic     | Mosaic w/o wildtype |
| Embryo #5                   | Biallelic     | Biallelic     | Mosaic w/o wildtype |
| Embryo #6                   | Biallelic     | Homozygous    | Mosaic w/o wildtype |
| Embryo #7                   | Biallelic     | Homozygous    | Mosaic w/ wildtype  |
| Embryo #8                   | Biallelic     | Biallelic     | Mosaic w/o wildtype |
| Embryo #9                   | Homozygous    | Biallelic     | Mosaic w/ wildtype  |
| Embryo #10                  | Biallelic     | Biallelic     | Mosaic w/ wildtype  |

Table S2. Development of *TET1* KO embryos to blastocyst stage. Frequency of blastocyst formation at day 7 decreased in *TET1* KO embryos compared to that in IVF control and injection control (Cas9 only) embryos. Different letters indicate statistical difference.

|                          | Number of blastocysts at day 7 (%) | Number of oocytes used |
|--------------------------|------------------------------------|------------------------|
| IVF control              | 111 (28.8) <sup>a</sup>            | 385                    |
| Injection control (Cas9) | 164 (18.5) <sup>b</sup>            | 885                    |
| <i>TET1</i> KO           | 119 (12.4) <sup>c</sup>            | 958                    |

Table S3. Development of embryos treated with DMOG. Frequency of blastocyst formation at day 7 decreased in embryos treated with DMOG compared to that in control embryos. Different letters indicate statistical difference.

|         | Number of blastocysts at day 7 (%) | Number of oocytes used |
|---------|------------------------------------|------------------------|
| Control | 304 (21.3) <sup>a</sup>            | 1429                   |
| DMOG    | 261 (17.6) <sup>b</sup>            | 1484                   |

Table S4. Information of sgRNAs used for depletion of *TET1* gene.

| sgRNAs              | Sequence (5' → 3')   |
|---------------------|----------------------|
| <i>TET1</i> _sgRNA1 | TGTCTCGATCTCGCCATGCA |
| <i>TET1</i> _sgRNA2 | GTGCTCATCATGGTATGGGA |
| <i>TET1</i> _sgRNA3 | AGTCGAACCTGTACATGTCA |

Table S5. Primers used for RT-qPCR analysis.

| Primers                | Sequence (5' → 3')        |
|------------------------|---------------------------|
| <i>GAPDH</i> _forward  | ATGACATCAAGAAGGTGGTGAAGC  |
| <i>GAPDH</i> _reverse  | CCAGCATCAAAAGTGGAAAGAGTGA |
| <i>OCT4</i> _forward   | TTTGGGAAGGTGTTTCAGCCAAACG |
| <i>OCT4</i> _reverse   | TCGGTTCTCGATACTTGTCCGCTT  |
| <i>NANOG</i> _forward  | AGGACAGCCCTGATTCTTCCACAA  |
| <i>NANOG</i> _reverse  | AAAGTTCTTGCATCTGCTGGAGGC  |
| <i>SOX2</i> _forward   | TGTCGGAGACGGAGAAGCG       |
| <i>SOX2</i> _reverse   | CGGGGCCGGTATTTATAATCC     |
| <i>KLF2</i> _forward   | CGATCCTCCTTGACGAATTT      |
| <i>KLF2</i> _reverse   | CAAGCCTCGATCCTCTAGT       |
| <i>ESRRB</i> _forward  | CTGCAAGGCCTTCTTCAA        |
| <i>ESRRB</i> _reverse  | CGTTTGGTGATCTCACACTC      |
| <i>ZFP42</i> _forward  | GGATTCCTTCTCTGACTGTTAC    |
| <i>ZFP42</i> _reverse  | GCTCTTGTTCTGATCCTTCTT     |
| <i>DPPA3</i> _forward  | CTCAGGCTTGTCCCAAATG       |
| <i>DPPA3</i> _reverse  | CGTCAAGTTACTGAGGTTCTG     |
| <i>PRDM14</i> _forward | GAGCCTGCAGGTCATAAAG       |
| <i>PRDM14</i> _reverse | CTTGAGATGCTTGTCTCTGTAA    |
| <i>TCL1A</i> _forward  | GGCAAAGGCTGTGTATGT        |
| <i>TCL1A</i> _reverse  | CCTGACGCATGAGTACTTG       |
| <i>SOX17</i> _forward  | CTTCATGGTGTGGGCTAAGG      |
| <i>SOX17</i> _reverse  | CGGCCGGTACTTGTAGTTG       |

|                       |                            |
|-----------------------|----------------------------|
| <i>GATA6</i> _forward | GCTGCACAGTCTACAGAGTC       |
| <i>GATA6</i> _reverse | AGCGGTTGCACAAGTAGT         |
| <i>GATA4</i> _forward | AAGAGATGCGTCCCATCAAG       |
| <i>GATA4</i> _reverse | GACTGGCTGACCGAAGATG        |
| <i>CDX2</i> _forward  | AACCTGTGCGAGTGGATG         |
| <i>CDX2</i> _reverse  | CCTTTCTCCGAATGGTGATGTA     |
| <i>TEAD4</i> _forward | TGTGAGTACATGGTCAACTTCAT    |
| <i>TEAD4</i> _reverse | GCTGACACCTCGAAGACATAC      |
| <i>GATA3</i> _forward | TACTACGGAAACTCGGTGAGG      |
| <i>GATA3</i> _reverse | TGGATGGACGTCTTGGAGAA       |
| <i>TET1</i> _forward  | TGTCGGCTTGGCAAGAAAGA       |
| <i>TET1</i> _reverse  | AGACCACTGTGCTGCCATTA       |
| <i>TET2</i> _forward  | GTGAGATCACTCACCCATCGCATA   |
| <i>TET2</i> _reverse  | TACTGGCACTATCAGCATCACAGG   |
| <i>TET3</i> _forward  | TCTTCCGTTCGTTTCAGCTACTACAG |
| <i>TET3</i> _reverse  | GTGGAGGTCTGGCTTCTTAAA      |



Table S6. Primers used for PCR amplification of bisulfite converted DNA.

| Primers                         | Sequence (5' → 3')               |
|---------------------------------|----------------------------------|
| <i>NANOG</i> promoter1_forward  | AAAATTAGGTAGAGATATTATTA AAAA     |
| <i>NANOG</i> promoter1_reverse  | AAATATCCCTCTATACCCACTTAAC        |
| <i>NANOG</i> promoter2_forward  | CTTATATAGGAAGAGAAGAGATTAAATTG    |
| <i>NANOG</i> promoter2_reverse  | CCCAACAATACTTACTAAATAAACTTTCC    |
| <i>NANOG</i> gene-body1_forward | CTAATTTAATATGAGTGTGGA            |
| <i>NANOG</i> gene-body1_reverse | GAATATTA AAAAATTCTTACATCTACTAAAA |
| <i>NANOG</i> gene-body2_forward | GAGAGGTAGAAGTATTTTAGTTTTAGTAGA   |
| <i>NANOG</i> gene-bopy2_reverse | GTAAAATAATTTAAAAATAAATCCATAATTT  |

Table S7. PCR conditions for amplification of bisulfite converted DNA

| Amplified regions             | Primers                         | PCR conditions                                                                                                                                                                                            |
|-------------------------------|---------------------------------|-----------------------------------------------------------------------------------------------------------------------------------------------------------------------------------------------------------|
| <i>NANOG</i> promoter part 1  | <i>NANOG</i> promoter1_forward  | Initial denaturation for 2 min at 95°C and 40 cycles of denaturation for 30 sec at 95°C, annealing for 30 sec at 50°C, extension for 30 sec min at 72°C, followed by a final extension for 2 min at 72°C. |
|                               | <i>NANOG</i> promoter1_reverse  |                                                                                                                                                                                                           |
| <i>NANOG</i> promoter part 2  | <i>NANOG</i> promoter2_forward  | Initial denaturation for 2 min at 95°C and 40 cycles of denaturation for 30 sec at 95°C, annealing for 30 sec at 50°C, extension for 45 sec min at 72°C, followed by a final extension for 2 min at 72°C. |
|                               | <i>NANOG</i> promoter2_reverse  |                                                                                                                                                                                                           |
| <i>NANOG</i> gene-body part 1 | <i>NANOG</i> gene-body1_forward | Initial denaturation for 2 min at 95°C and 40 cycles of denaturation for 30 sec at 95°C, annealing for 30 sec at 45°C, extension for 30 sec min at 72°C, followed by a final extension for 2 min at 72°C. |
|                               | <i>NANOG</i> gene-body1_reverse |                                                                                                                                                                                                           |
| <i>NANOG</i> gene-body part 2 | <i>NANOG</i> gene-body2_forward | Initial denaturation for 2 min at 95°C and 40 cycles of denaturation for 30 sec at 95°C, annealing for 30 sec at 50°C, extension for 30 sec min at 72°C, followed by a final extension for 2 min at 72°C. |
|                               | <i>NANOG</i> gene-body2_reverse |                                                                                                                                                                                                           |
